# Supplementary material for: Meta-analysis of peripheral blood gene expression modules for COPD phenotypes
Source: PubMed Central journal article supplement (PMC5633174; doi:10.1371/journal.pone.0185682), 2017-10-09
Supplement: pone.0185682.s011.pdf [file pone.0185682.s011.pdf]

**S1 Table.**

| Outcome               | Model (R function)   | Covariates Included in Model*                     |
|-----------------------|----------------------|---------------------------------------------------|
| FEV <sub>1</sub> %    | Linear regr. (lm)    | Intercept only                                    |
| FEV <sub>1</sub> /FVC | Beta regr. (betareg) | Age, Sex                                          |
| Frac. Emph.           | Beta regr. (betareg) | Age, Sex, FEV <sub>1</sub> %, BMI, Smok. Status** |

\* All models include an intercept term.

\*\* Only COPDGene data is adjusted for smoking status, since only this cohort has current smokers.
