# Supplementary material for: Meta-analysis of peripheral blood gene expression modules for COPD phenotypes
Source: PubMed Central journal article supplement (PMC5633174; doi:10.1371/journal.pone.0185682), 2017-10-09
Supplement: pone.0185682.s012.pdf [file pone.0185682.s012.pdf]

S2 Table.

| Module                                                        | Top Molecular Function                                          | Ref. list<br>6322 genes | # Hits | Fold<br>Enrich. | p-value | p.adjust |
|---------------------------------------------------------------|-----------------------------------------------------------------|-------------------------|--------|-----------------|---------|----------|
| black<br>164 genes                                            | RNA polym. II basal transcription factor binding (GO:0001091)   | 5                       | 2      | 15.42           | 7.7E-03 | 4.3E-02  |
|                                                               | 3-hydroxyacyl-CoA dehydrogenase activity (GO:0003857)           | 6                       | 2      | 12.85           | 1.1E-02 | 4.3E-02  |
|                                                               | DNA replication origin binding (GO:0003688)                     | 6                       | 2      | 12.85           | 1.1E-02 | 4.3E-02  |
|                                                               | Tat protein binding (GO:0030957)                                | 6                       | 2      | 12.85           | 1.1E-02 | 4.3E-02  |
|                                                               | promoter-specific chromatin binding (GO:1990841)                | 6                       | 2      | 12.85           | 1.1E-02 | 4.3E-02  |
|                                                               | organic cyclic compound binding (GO:0097159)                    | 2519                    | 78     | 1.19            | 2.7E-02 | 4.7E-02  |
|                                                               | heterocyclic compound binding (GO:1901363)                      | 2499                    | 77     | 1.19            | 3.2E-02 | 4.7E-02  |
|                                                               | ATPase activity (GO:0016887)                                    | 197                     | 10     | 1.96            | 3.4E-02 | 4.7E-02  |
|                                                               | unfolded protein binding (GO:0051082)                           | 49                      | 4      | 3.15            | 4.0E-02 | 4.7E-02  |
| nucleic acid binding (GO:0003676)                             | 1758                                                            | 56                      | 1.23   | 4.4E-02         | 4.7E-02 |          |
| salmon<br>68 genes                                            | adenylyltransferase activity (GO:0070566)                       | 15                      | 4      | 24.79           | 2.3E-05 | 1.2E-04  |
|                                                               | double-stranded RNA binding (GO:0003725)                        | 47                      | 5      | 9.89            | 1.6E-04 | 7.0E-04  |
|                                                               | threonine-type endopeptidase activity (GO:0004298)              | 13                      | 3      | 21.45           | 3.9E-04 | 1.6E-03  |
|                                                               | threonine-type peptidase activity (GO:0070003)                  | 13                      | 3      | 21.45           | 3.9E-04 | 1.6E-03  |
|                                                               | tumor necrosis factor receptor binding (GO:0005164)             | 15                      | 3      | 18.59           | 6.0E-04 | 2.3E-03  |
|                                                               | RNA polym. II core promoter seq.-spec. DNA bind. (GO:0000979)   | 21                      | 3      | 13.28           | 1.6E-03 | 4.8E-03  |
|                                                               | tumor necrosis factor receptor superfamily binding (GO:0032813) | 24                      | 3      | 11.62           | 2.3E-03 | 6.2E-03  |
|                                                               | nucleotidyltransferase activity (GO:0016779)                    | 64                      | 4      | 5.81            | 5.1E-03 | 1.1E-02  |
|                                                               | zinc ion binding (GO:0008270)                                   | 503                     | 12     | 2.22            | 7.0E-03 | 1.3E-02  |
| transition metal ion binding (GO:0046914)                     | 572                                                             | 13                      | 2.11   | 7.4E-03         | 1.4E-02 |          |
| red<br>168 genes                                              | receptor activity (GO:0004872)                                  | 252                     | 19     | 2.84            | 4.7E-05 | 1.4E-03  |
|                                                               | molecular transducer activity (GO:0060089)                      | 252                     | 19     | 2.84            | 4.7E-05 | 1.4E-03  |
|                                                               | monoval. inorg. cation transmemb. transp. activity (GO:0015077) | 75                      | 9      | 4.52            | 2.0E-04 | 3.4E-03  |
|                                                               | active transmembrane transporter activity (GO:0022804)          | 106                     | 10     | 3.55            | 6.0E-04 | 6.8E-03  |
|                                                               | receptor binding (GO:0005102)                                   | 448                     | 24     | 2.02            | 8.3E-04 | 8.3E-03  |
|                                                               | actin binding (GO:0003779)                                      | 154                     | 12     | 2.93            | 9.3E-04 | 8.8E-03  |
|                                                               | hydrogen-exporting ATPase activity (GO:0036442)                 | 19                      | 4      | 7.92            | 1.8E-03 | 1.3E-02  |
|                                                               | protein phosphatase 1 binding (GO:0008157)                      | 10                      | 3      | 11.29           | 2.5E-03 | 1.5E-02  |
|                                                               | hydrogen ion transmembrane transporter activity (GO:0015078)    | 51                      | 6      | 4.43            | 2.6E-03 | 1.5E-02  |
| secondary active transmemb. transporter activity (GO:0015291) | 52                                                              | 6                       | 4.34   | 2.9E-03         | 1.6E-02 |          |
| greenyellow<br>100 genes                                      | peptidase regulator activity (GO:0061134)                       | 58                      | 6      | 6.54            | 3.4E-04 | 6.6E-03  |
|                                                               | endopeptidase inhibitor activity (GO:0004866)                   | 39                      | 5      | 8.11            | 4.1E-04 | 6.6E-03  |
|                                                               | peptidase inhibitor activity (GO:0030414)                       | 39                      | 5      | 8.11            | 4.1E-04 | 6.6E-03  |
|                                                               | monosaccharide binding (GO:0048029)                             | 24                      | 4      | 10.54           | 6.1E-04 | 7.6E-03  |
|                                                               | endopeptidase regulator activity (GO:0061135)                   | 43                      | 5      | 7.35            | 6.4E-04 | 7.6E-03  |
|                                                               | carbohydrate binding (GO:0030246)                               | 77                      | 6      | 4.93            | 1.5E-03 | 1.1E-02  |
|                                                               | cysteine-type endopeptidase inhibitor activity (GO:0004869)     | 22                      | 3      | 8.62            | 5.3E-03 | 2.0E-02  |
|                                                               | protease binding (GO:0002020)                                   | 44                      | 4      | 5.75            | 5.4E-03 | 2.0E-02  |
|                                                               | cytokine activity (GO:0005125)                                  | 29                      | 3      | 6.54            | 1.1E-02 | 2.6E-02  |
|                                                               | antioxidant activity (GO:0016209)                               | 30                      | 3      | 6.32            | 1.2E-02 | 2.7E-02  |
