# Supplementary material for: Meta-analysis of peripheral blood gene expression modules for COPD phenotypes
Source: PubMed Central journal article supplement (PMC5633174; doi:10.1371/journal.pone.0185682), 2017-10-09
Supplement: pone.0185682.s013.pdf [file pone.0185682.s013.pdf]

**S3 Table.**

|              | mono_d0 | mono_d1 | mono_d7 | NK-cell | t-cell  | b-cell  | neut    | dendr   | eos     | mast_baso | thelp   |
|--------------|---------|---------|---------|---------|---------|---------|---------|---------|---------|-----------|---------|
| turquoise    | 6.3E+00 | 2.2E-01 | 1.7E-01 | 1.0E+00 | 1.0E+00 | 1.0E+00 | 3.0E-02 | 2.8E-01 | 7.4E-01 | 6.7E-01   | 1.0E+00 |
| blue         | 5.9E-01 | 1.5E-02 | 6.3E-01 | 1.0E+00 | 3.7E-01 | 6.4E-01 | 1.0E+00 | 1.0E+00 | 1.0E-01 | 1.0E+00   | 7.4E-01 |
| midnightblue | 1.0E+00 | 1.0E+00 | 2.2E-01 | 1.0E+00 | 1.0E+00 | 1.0E+00 | 2.5E-01 | 1.0E+00 | 1.0E+00 | 1.0E+00   | 1.0E+00 |
| tan          | 4.5E-01 | 8.4E-01 | 2.4E-03 | 5.4E-01 | 1.0E+00 | 5.4E-01 | 1.0E+00 | 1.0E+00 | 6.4E-02 | 1.0E+00   | 9.6E-01 |
| black        | 1.0E+00 | 7.0E-01 | 1.0E+00 | 9.1E-03 | 4.9E-01 | 1.0E+00 | 1.0E+00 | 1.0E+00 | 1.0E+00 | 1.0E+00   | 8.5E-02 |
| cyan         | 1.0E+00 | 2.3E-01 | 1.0E+00 | 1.0E+00 | 1.0E+00 | 1.0E+00 | 1.0E+00 | 1.0E+00 | 6.0E-02 | 1.0E+00   | 1.0E+00 |
| salmon       | 1.0E+00 | 3.2E-01 | 1.0E+00 | 1.0E+00 | 1.0E+00 | 1.0E+00 | 1.0E+00 | 2.1E-02 | 1.0E+00 | 1.0E+00   | 1.0E+00 |
| lightcyan    | 1.0E+00 | 6.5E-01 | 1.0E+00 | 1.0E+00 | 4.5E-01 | 3.6E-01 | 6.8E-01 | 1.0E+00 | 2.2E-01 | 1.0E+00   | 2.0E-01 |
| green        | 3.3E-01 | 7.7E-01 | 7.4E-01 | 1.7E-02 | 5.6E-01 | 4.6E-01 | 1.0E+00 | 1.0E+00 | 1.0E+00 | 1.0E+00   | 6.9E-01 |
| pink         | 5.0E-01 | 5.5E-01 | 1.0E+00 | 1.0E+00 | 1.0E+00 | 1.0E+00 | 1.0E+00 | 4.2E-01 | 1.0E+00 | 1.0E+00   | 9.9E-02 |
| magenta      | 1.0E+00 | 4.8E-01 | 4.6E-01 | 1.0E+00 | 1.0E+00 | 1.0E+00 | 1.8E-02 | 1.0E+00 | 1.0E+00 | 1.0E+00   | 1.0E+00 |
| yellow       | 1.0E+00 | 8.0E-01 | 4.1E-01 | 1.0E+00 | 5.9E-01 | 4.9E-01 | 4.9E-01 | 2.8E-01 | 3.2E-01 | 2.7E-01   | 9.4E-01 |
| red          | 4.5E-01 | 2.4E-01 | 1.0E+00 | 1.0E+00 | 1.0E+00 | 1.0E+00 | 7.9E-06 | 1.0E+00 | 1.0E+00 | 1.0E+00   | 1.0E+00 |
| greenyellow  | 1.3E-03 | 1.7E-01 | 1.4E-01 | 1.0E+00 | 1.0E+00 | 1.0E+00 | 1.0E+00 | 2.0E-01 | 1.0E+00 | 1.0E+00   | 1.0E+00 |
| grey         | 1.0E+00 | 1.0E+00 | 9.7E-01 | 2.9E-01 | 1.8E-02 | 6.8E-02 | 9.3E-01 | 4.1E-01 | 9.8E-01 | 1.4E-01   | 2.7E-05 |
